# Supplementary material for: A Joint Reconstruction and Model Selection Approach for Large Scale Inverse Modeling
Source: Copernicus journal article supplement (doi:10.5194/gmd-2024-90), 2024-07-04
Supplement: Supplementary file [file gmd-2024-90-AC3-supplement.pdf]

# Geoscientific Model Development

## Reply to topic editor

“A Joint Reconstruction and Model Selection Approach for Large Scale Inverse Modeling”  
by Malena Sabate Landman, Julianne Chung, Jiahua Jiang, Arvind K. Saibaba, and Scot M. Miller

September 25, 2024

Dear authors,

Thank you for submitting your manuscript to GMD. While we are currently looking for reviewers, there is one additional point I partly overlooked in the initial assessment process, namely, the fact that it would be valuable to have the software name and version you used to implement your novel algorithm to be more explicitly stated in the introduction, as well as in the title (as per GMD guidelines).

Thanks so much for your message and for your detailed work in handling our submission.

As requested, we have added the software and algorithm name to the title of the paper and included a statement in the introduction of the paper.

Please address this point in a later stage, when working on addressing referees' comments.

Thank you.

Best regards, Ludovic Räss
