# Supplementary material for: A Joint Reconstruction and Model Selection Approach for Large Scale Inverse Modeling
Source: Copernicus journal article supplement (doi:10.5194/gmd-2024-90), 2024-07-04
Supplement: Supplementary file [file gmd-2024-90-RC2-supplement.pdf]

# Review of “A Joint Reconstruction and Model Selection Approach for Large Scale Inverse Modeling” (gmd-2024-90) for Geoscientific Model Development

In this manuscript, the authors propose a modelling and algorithmic approach for performing model selection in large-scale inverse problems. The context is that a set of predictor variables (say, meteorological variables) are used in a linear model to predict an unknown quantity  $\mathbf{s}$  (say, surface fluxes). The unknown quantity  $\mathbf{s}$  is related to the observations through a forward model. Interest is on both estimating  $\mathbf{s}$  and on identifying a small subset of the predictor variables that are most informative of  $\mathbf{s}$ . To achieve this, the authors propose a sparsity-promoting prior on the coefficients of the predictors, and develop a hybrid iterative projection method based on flexible Krylov subspace methods for efficient optimization.

The paper is well written and the novelty and significance of the work is well justified. The paper is well organized and the figures are clear and informative. The authors perform extensive simulation studies to validate their method. My comments are mostly minor and relate to the (lack of) discussion of prior work in the statistical literature on model selection, as well as some minor points regarding the simulation studies.

My detailed comments are as follows:

1. The proposed model structure in (7) places a Laplace prior on  $\beta$ , the coefficients of the predictors. This is a common choice for promoting sparsity in the coefficients, which is often called the Bayesian LASSO (Park and Casella, 2008). It would be worthwhile for the authors to discuss this connection: indeed this present manuscript could be seen as the extension of the Bayesian LASSO into the inversion context.  
  
Park and Casella (2008) also address the problem of performing Markov chain Monte Carlo for this model so it may also be worth mentioning in the Conclusion where uncertainty quantification is discussed.
2. Relatedly, there is literature discussing the implications of the choice of sparsity promoting prior. For example, Carvalho et al. (2010), in proposing an alternative sparsity promoting prior, discuss the limitations of the Laplace prior and other choices, and Piironen and Vehtari (2017) discuss ways to tune sparsity promoting priors. While an extensive discussion of these choices is beyond the scope of this paper, a brief mention of how these modelling choices can impact the results would be useful.
3. I was a bit confused by the one-dimension simulation example in Section 4.1. Here are my questions, which I suggest the authors clarify in the manuscript:
  - (a) In Figures 2 and 3, what is the  $x$ -axis showing?
  - (b) In Figure 2(b), can the authors show  $\mathbf{s}$  and  $\mathbf{X}\beta$  as well as the blurred observation?
  - (c) In Figure 3(a), I was surprised to see that all methods noticeably overestimate the true function, particularly for the  $x$ -axis values between 0 and 0.5. Shouldn't the stochastic component,  $\zeta$ , correct this? How does this error arise?
  - (d) What exactly is the “reconstruction error norm” and the “relative reconstruction error norm” shown in Figure 5 and mentioned in the text (also in the later simulation studies)?
4. In discussing the partial  $F$ -test in Section 2, it may be worth mentioning that the “smaller” model must nest within the “larger” model, a notable limitation of the  $F$ -test compared to competing methods.
5. Minor points:

- (a) Lines 419–420: the references Miller et al and Liu et al would be better parenthesised.
- (b) Lines 485–486: I’m surprised that the elements of  $\mathbf{Q}$  have units  $(\text{ppm})^2$ —isn’t this quantity a flux?

## References

- Carvalho, C. M., Polson, N. G., and Scott, J. G. (2010). The horseshoe estimator for sparse signals. *Biometrika*, 97(2):465–480.
- Park, T. and Casella, G. (2008). The Bayesian Lasso. *Journal of the American Statistical Association*, 103(482):681–686.
- Piironen, J. and Vehtari, A. (2017). Sparsity information and regularization in the horseshoe and other shrinkage priors. *Electronic Journal of Statistics*, 11(2):5018–5051.
